# Supplementary material for: Stochastic ordering of complexoform protein assembly by genetic circuits
Source: PLoS Comput Biol. 2020 Jun 29;16(6):e1007997. doi: 10.1371/journal.pcbi.1007997 (PMC7351240; doi:10.1371/journal.pcbi.1007997)
Supplement: S2 Appendix — (PDF) [file pcbi.1007997.s002.pdf]

## S2 Appendix. Simulation rates and initial conditions

Every simulation is initiated with an amount of promoter, RNA polymerase, and ribosome, as well as 10 unoccupied scaffold proteins with two binding sites each. In the simulations, the translation rate  $k_p$ , the protein export rate  $k_{out}$ , and the protein binding rate  $k_{bind}$  are all varied individually. Unless otherwise indicated, the initial conditions and rates are as indicated below for both the stochastic and deterministic computational solutions. All units are indicated in arbitrary units of concentration, [C], and time, t.

### Parallel / Series Uncoupled / Series Coupled Genetic Circuits

| Reactant  | Initial value [C] |
|-----------|-------------------|
| $P$       | 2                 |
| $RNAP$    | 100               |
| $Rib$     | 100               |
| $sca.sca$ | 10                |

| Rate            | Value              |
|-----------------|--------------------|
| $k_{pro}$       | $1 [C]^{-1}t^{-1}$ |
| $k_{pro-}$      | $0.01 t^{-1}$      |
| $k_{gene}$      | $0.1 t^{-1}$       |
| $k_m$           | $1 t^{-1}$         |
| $k_p$           | $1 [C]^{-1}t^{-1}$ |
| $k_{mrna-loss}$ | $0.2 t^{-1}$       |
| $k_{out}$       | $1 t^{-1}$         |
| $k_{bind}$      | $1 [C]^{-1}t^{-1}$ |
| $k_{out-loss}$  | $0.01 t^{-1}$      |

12 Cascade Genetic Circuit

| Reactant  | Initial value [C] |
|-----------|-------------------|
| $P1$      | 2                 |
| $P2$      | 2                 |
| $RNAP$    | 100               |
| $Rib$     | 100               |
| $sca.sca$ | 10                |

| Rate            | Value                  |
|-----------------|------------------------|
| $k_{pro}$       | $1 [C]^{-1} \tau^{-1}$ |
| $k_{pro-}$      | $0.01 \tau^{-1}$       |
| $k_{pro-loss}$  | $0.01 \tau^{-1}$       |
| $k_{gene}$      | $0.1 \tau^{-1}$        |
| $k_m$           | $1 \tau^{-1}$          |
| $k_p$           | $1 [C]^{-1} \tau^{-1}$ |
| $k_{mrna-loss}$ | $0.2 \tau^{-1}$        |
| $k_{out}$       | $1 \tau^{-1}$          |
| $k_{bind}$      | $1 [C]^{-1} \tau^{-1}$ |
| $k_{out-loss}$  | $0.01 \tau^{-1}$       |

13

14

15

16
